# Supplementary material for: Comparative analysis of IgG responses to Plasmodium falciparum MSP1p19 and PF13-DBL1α1 using ELISA and a magnetic bead-based duplex assay (MAGPIX®-Luminex) in a Senegalese meso-endemic community
Source: PubMed Central journal article supplement (PMC4221706; doi:10.1186/1475-2875-13-410), 2014-10-17

**Age-groups**     <5     5-9     10-14     15-29     ≥30

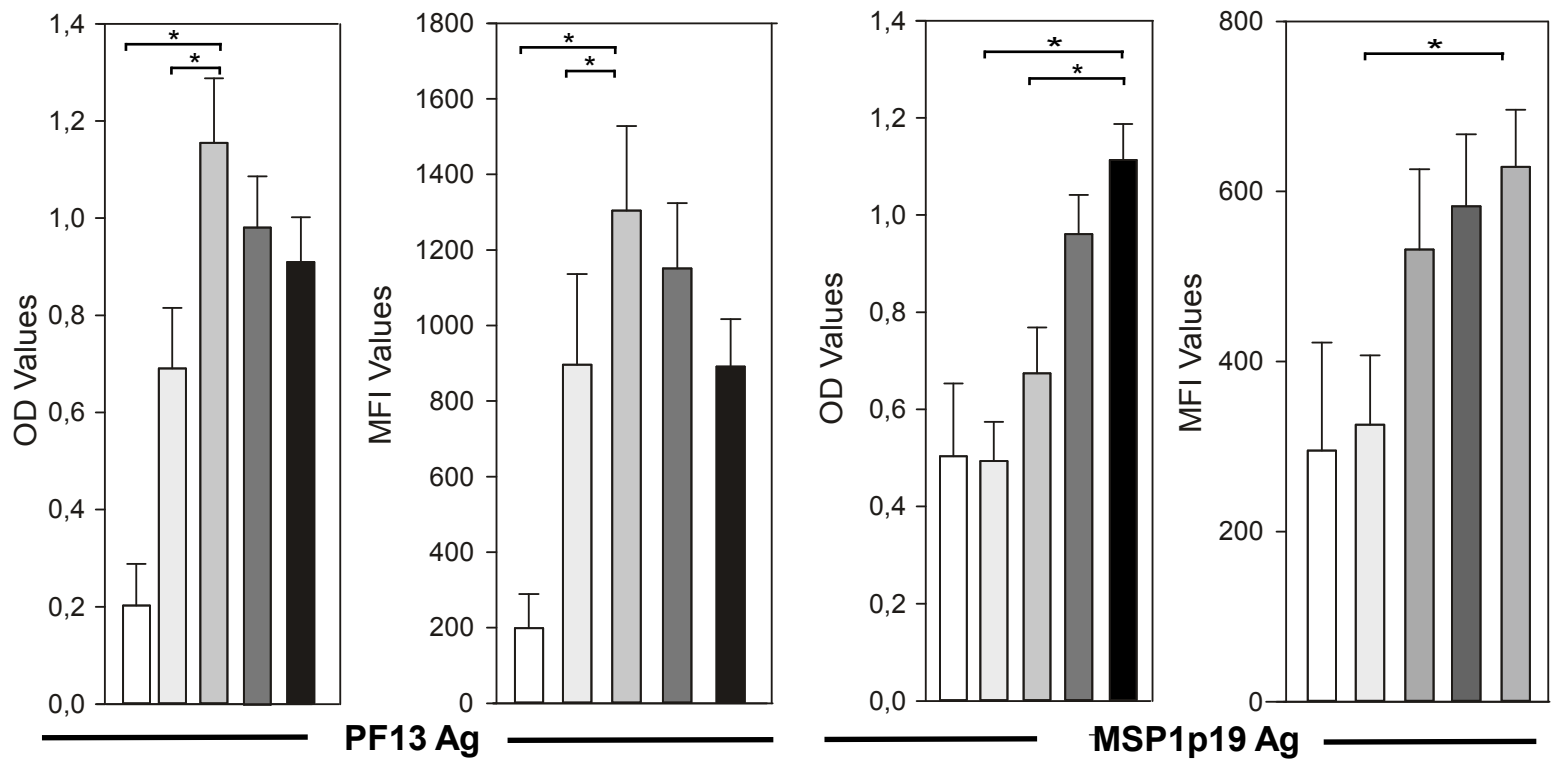

Supplement: 12936_2014_3579_MOESM1_ESM.pdf [file 12936_2014_3579_MOESM1_ESM.pdf]
